# 1 **Temporal dynamics of GABA and Glx in the visual cortex**

2 Reuben Rideaux

3 Department of Psychology, Downing Street, University of Cambridge, CB2 3EB, UK

4 [reuben.rideaux@gmail.com](mailto:reuben.rideaux@gmail.com)

## 5 **ABSTRACT**

6 Magnetic resonance spectroscopy (MRS) can be used in vivo to quantify metabolite  
7 concentration and provide evidence for the involvement of different neurotransmitter systems,  
8 e.g., inhibitory and excitatory, in sensory and cognitive processes. The relatively low signal-  
9 to-noise of MRS measurements has shaped the types of questions that it has been used to  
10 address. In particular, temporal resolution is often sacrificed in MRS studies to achieve  
11 sufficient signal to produce a reliable estimate of metabolite concentration. Here we apply  
12 novel analyses with large datasets to reveal the dynamics of GABA+ and Glx in the visual  
13 cortex while participants are at rest (with eyes closed) and compare this with changes in the  
14 posterior cingulate cortex. We find that the dynamic concentration of GABA+ and Glx in the  
15 visual cortex drifts in opposite directions, that is, GABA+ decreased while Glx increases over  
16 time. Further, we find that in the visual cortex, the concentration of GABA+ predicts that of  
17 Glx, such that a change in GABA+ is correlated with a subsequent opposite change in Glx.  
18 Together, these results expose novel temporal trends and interdependencies of primary  
19 neurotransmitters in the visual cortex. More broadly, we demonstrate the feasibility of using  
20 MRS to investigate in vivo dynamic changes of metabolites.

21 **Keywords:** Magnetic resonance spectroscopy; visual cortex; GABA; Glx; temporal dynamics

## 22 INTRODUCTION

23 Magnetic resonance spectroscopy (MRS) can be used in vivo to measure the  
24 concentration of metabolites within the brain. Whereas the blood-oxygen-level-dependent  
25 signal measured using functional magnetic resonance imaging (fMRI) cannot distinguish  
26 between different systems of activity, e.g., excitatory and inhibitory, measuring the  
27 concentration of neurotransmitters within the brain with MRS can begin to differentiate  
28 between these systems. For the purpose of understanding neural mechanisms, identifying the  
29 involvement of neurotransmitter systems that support sensory/cognitive processes can be  
30 more informative than locating regions of neural representation.

31 The methodological approaches used to investigate sensory/cognitive processing with  
32 MRS can be separated into two categories: correlational and functional. The common  
33 correlational approach is to measure the concentration of metabolites in a group of  
34 participants, within a brain region of interest, and test whether individual variance of a  
35 particular metabolite is related to performance on a task supported by the sensory/cognitive  
36 process. For example, concentration of the inhibitory neurotransmitter  $\gamma$ -aminobutyric acid  
37 (GABA) in the visual cortex is inversely related with visual discrimination of orientation (Edden  
38 et al., 2009; Kurcyus et al., 2018; Mikkelsen et al., 2018a). This finding has been interpreted  
39 as indicating that sharp neuronal tuning for orientation is supported by inhibition.

40 A common functional approach used to identify metabolite involvement is to measure  
41 baseline metabolite concentration while a participant is “at rest” and compare this with another  
42 measurement taken while the participant performs a task. A difference metabolite  
43 concentration observed between the two measurements may be taken as evidence of its  
44 involvement in the sensory/cognitive processes supporting the task. For example, GABA  
45 concentration in the visual cortex is different when participants view stereoscopic images  
46 composed of both light and dark features, compared to just light or dark features (Rideaux et  
47 al., 2019). This has been interpreted as evidence for the increased involvement of inhibition  
48 in visual processing of combined light and dark features.

49 Another functional approach is also used, in which the second measurement is taken  
50 following (rather than during) the event or activity. For example, Lunghi et al. (2015b)  
51 measured GABA concentration in the human visual cortex before and after a period of  
52 monocular deprivation and found a reduction. This finding is consistent with previous work in  
53 humans (Boroojerdi et al., 2001, 2000; Lunghi et al., 2015a) and mice (He et al., 2006; Huang  
54 et al., 2010) showing increased excitability in the visual cortex following a period of  
55 (monocular/binocular) visual deprivation, and suggest that there are dynamic changes in  
56 GABA in the visual cortex during periods of visual deprivation.

57           While MRS can be used to differentiate excitatory and inhibitory transmission within  
58 the brain, compared to fMRI it is severely limited in terms of its temporal resolution, which is  
59 constrained by the signal-to-noise ratio of measurements acquired using the technique.  
60 Although the duration that restricts the temporal resolution of MRS (i.e., the relaxation time)  
61 can be similar to that of fMRI (i.e., ~2s), in order to yield a reliable measurement of metabolite  
62 concentration from within the brain, multiple transients must be combined to reach a sufficient  
63 signal-to-noise ratio (Mikkelsen et al., 2018b). For example, it is common to combine between  
64 200-300 transients (~10 min) to produce a single measure of metabolite concentration (Puts  
65 and Edden, 2012). This approach, while often necessary, obscures dynamic changes in  
66 metabolite concentration that occur during this period.

67           Here we overcome the signal-to-noise limitation of MRS by applying temporal analyses  
68 of metabolite concentration to a large dataset of participants. We measure the dynamic  
69 concentration of GABA and Glx in the visual cortex of human participants while at rest (with  
70 closed eyes), from a dataset containing 69 scans. We compare these results with data from  
71 the posterior cingulate cortex of 196 participants at rest (Mikkelsen et al., 2019, 2017). To  
72 observe the dynamics of metabolites, we process the data in two ways. We first take a moving  
73 average of a ~6 min period, which reveals low frequency trends in the data consistent with  
74 previous work (Lunghi et al., 2015b); that is, GABA reduces and Glx increases. Next, using a  
75 new technique, we combine data across participants (rather than time), which allows us to  
76 track the concentration of metabolites with relatively high temporal resolution (12 sec) over a  
77 13 min period. This novel approach exposes large changes in GABA+ and Glx, previously  
78 obscured by averaging over long durations. Further, we reveal a striking relationship between  
79 GABA+ and Glx in the visual cortex: a change in GABA+ predicts the opposite change in Glx  
80 both ~30 and ~120 sec later.

81           The relative low signal-to-noise of MRS has shaped the approaches with which the  
82 technique has been used to study the brain. Here we overcome this limitation by using a new  
83 technique that combines measurements across a large sample of data, which reveals novel  
84 dynamic trends and interactions within and between neurotransmitters.

## 85 **METHODS**

### 86 ***Participants***

87 Fifty-eight healthy participants from the University of Cambridge with normal or  
88 corrected-to-normal vision participated in the experiment. The mean age was 24.4 yr (range  
89 = 19.4–40.5 yr; 31 women). Nine of the participants, including the author (RR), repeated the  
90 experiment twice and one participant repeated three times, on different days; thus, the total  
91 number of scans was sixty-nine. Participants were screened for contra-indications to MRI prior  
92 to the experiment. All experiments were conducted in accordance with the ethical guidelines  
93 of the Declaration of Helsinki and were approved by the University of Cambridge ethics  
94 committee and all participants provided informed consent.

### 95 ***Data collection***

96 Participants underwent a MR spectroscopic acquisition targeting the visual cortex at  
97 the Cognition and Brain Sciences Unit (Cambridge, UK). During the acquisition, the lights in  
98 the room were turned off and participants were instructed to close their eyes. To compare  
99 these with data measured from another brain region, we reanalysed previously gathered MR  
100 spectroscopic data targeting the posterior cingulate cortex (Mikkelsen et al., 2019, 2017). For  
101 the purpose of further comparison, we also reanalysed data from a study investigating  
102 metabolite concentrations in the visual cortex under different viewing conditions (Kurcyus et  
103 al., 2018).

### 104 ***Data acquisition***

105 Magnetic resonance scanning targeting visual cortex was conducted on a 3T Siemens  
106 Prisma equipped with a 32-channel head coil. Anatomical T1-weighted images were acquired  
107 for spectroscopic voxel placement with an ‘MP-RAGE’ sequence. For detection of GABA+  
108 (GABA and co-edited macromolecules) and Glx (a complex comprising Glutamate and  
109 Glutamine), spectra were acquired using a MEGA-PRESS sequence (Mescher et al., 1998,  
110 1996): TE=68 ms, TR=3000 ms; 256 transients of 2048 data points were acquired in 13 min  
111 experiment time; a 14.28 ms Gaussian editing pulse was applied at 1.9 (ON) and 7.5 (OFF)  
112 ppm; water unsuppressed 16 transients. Water suppression was achieved using variable  
113 power with optimized relaxation delays (VAPOR; Tkáč and Gruetter, 2005) and outer volume  
114 suppression (OVS). Automated shimming followed by manual shimming was conducted to  
115 achieve approximately 12 Hz water linewidth.

116 The “Big GABA” dataset comprises a collection of MRS datasets collected by different  
117 groups using the same parameters on GE, Phillips, and Siemens scanners. The following data  
118 from the Big GABA dataset was used in the current study: G4, G5, G7, G8, P1, P3, P4, P5,  
119 P6, P7, P8, P9, P10, S1, S6, & S8; the letter in the notion refers to the scanner make and the

120 number refers to the group that collected the data. With the exception of G1 and G6, this  
121 includes all the available Big GABA datasets. We used the macromolecule unsuppressed  
122 transients from these datasets for closer comparison with the visual cortex data, and we  
123 excluded data from G1 and G6 as these had fewer transients. A detailed description of the  
124 data acquisitions for these datasets can be found in Mikkelsen et al. (2019, 2017). To  
125 summarize the procedure, magnetic resonance scanning targeting posterior cingulate cortex  
126 was conducted on 3T Siemens, GE, and Phillips scanners equipped with 8-, 32-, or 64-  
127 channel head coils. Spectra were acquired using a MEGA-PRESS sequence: TE=68 ms,  
128 TR=2000 ms; 320 transients of either 2048 or 4096 data points were acquired in 12 min  
129 experiment time; a 15 ms Gaussian editing pulse was applied at 1.9 (ON) and 7.5 (OFF) ppm.

130 Spectra were acquired from a location targeting visual cortex, i.e., V1/V2 (**Fig. 1a**), and  
131 posterior cingulate cortex (**Fig. 1b**). The voxel targeting the visual cortex (3×3×2 cm) was  
132 placed medially in the occipital lobe; the lower face aligned with the cerebellar tentorium and  
133 positioned so to avoid including the sagittal sinus and to ensure it remained within the occipital  
134 lobe. The voxel targeting the posterior cingulate cortex (3×3×3 cm) was positioned in the  
135 medial parietal lobe and rotated in the sagittal plane to align with a line connecting the genu  
136 and splenium of the corpus callosum. The coordinates of the voxel location were used to draw  
137 a mask on the anatomical T1-weighted image to calculate the volume of grey matter (GM),  
138 white matter (WM), and cerebral spinal fluid (CSF) within each voxel. Segmentation was  
139 performed using the Statistical Parametric Mapping toolbox for MATLAB (SPM12,  
140 <http://www.fil.ion.ucl.ac.uk/spm/>).

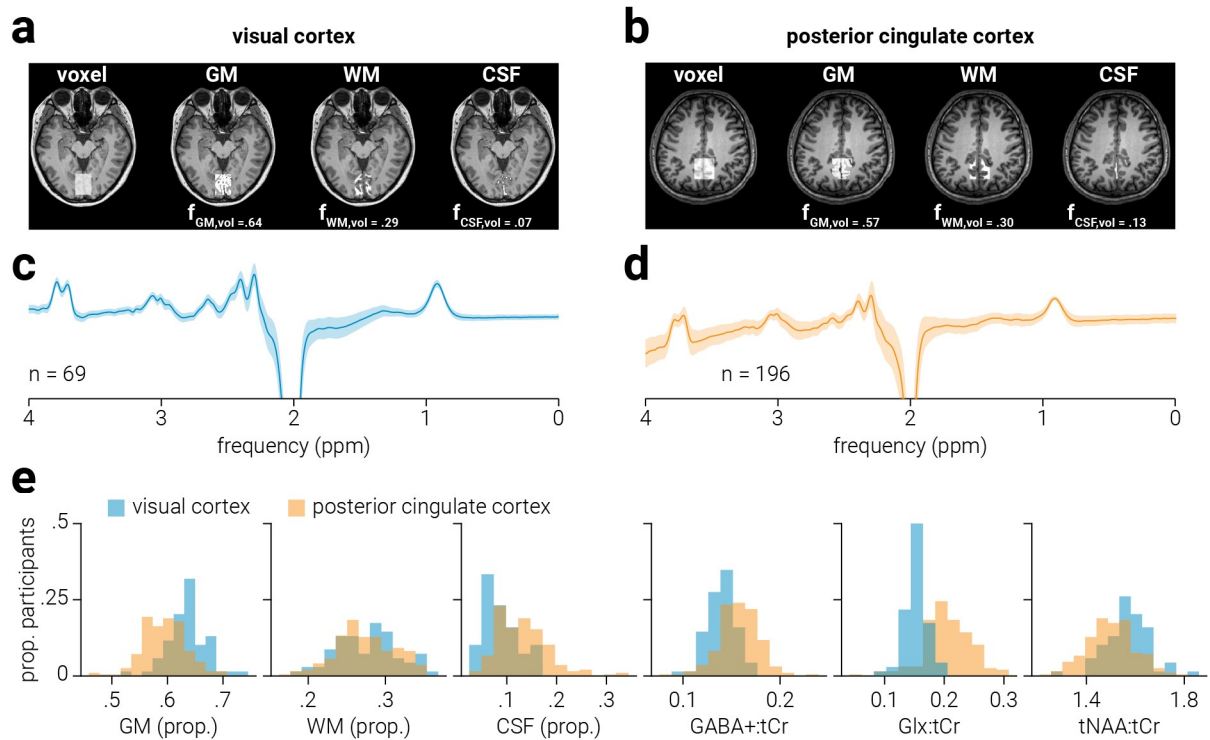

141 **Figure 1. Data acquisition.** Representative MRS voxel placement for **a)** visual and **b)** posterior  
142 cingulate cortices on a T1-weighted structural image and probabilistic partial volume maps  
143 following tissue segmentation for one participant. Corresponding tissue proportions of grey matter  
144 (GM), white matter (WM) and cerebrospinal fluid (CSF) are shown. Average spectra across all  
145 subjects for **c)** visual and **d)** posterior cingulate cortices; number of subjects comprising each average  
146 spectrum is shown and grey shaded regions indicate standard deviation. **e)** Distribution of (GM, WM,  
147 CSF) voxel tissue proportions, and (GABA+, Glx, tNAA) metabolite concentrations across participants  
148 for visual and posterior cingulate cortices.

149 In addition to the abovementioned primary datasets, we also reanalysed a subset of  
150 the data from Kurcyus et al. (2018); scans for which the authors had access to in individual  
151 transient format (as opposed to average of all transients across the scan). The dataset we  
152 reanalysed comprised 29, 27, and 28 measurements from an MRS voxel targeting V1, while  
153 participants had their eyes closed, open in darkness, or open while viewing an alternating  
154 checkerboard stimulus, respectively. A detailed description of the data acquisitions is provided  
155 in Kurcyus et al. (2018). To summarize the procedure, magnetic resonance scanning targeting  
156 visual cortex was conducted on a 3T Siemens Biograph mMR system equipped a 12-channel  
157 head coil. Spectra were acquired using a MEGA-PRESS sequence: TE=68 ms, TR=2000 ms;  
158 256 transients of 2048 data points were acquired in 8.6 min experiment time; editing J-  
159 refocusing pulse irradiated at 1.9 (ON) and 7.5 (OFF) ppm.

### 160 **Data processing**

161 Spectral quantification was conducted in MATLAB using GANNET v3.1  
162 ([www.gannetmrs.com](http://www.gannetmrs.com); Edden et al., 2014) and in-house scripts. Frequency, phase, area, and  
163 full width at half maximum (FWHM) parameters of the Creatine peak at 3.0 ppm were

164 estimated by fitting a Lorentzian peak to the data and individual spectra with parameter  
165 estimates >3 std from the mean were omitted from further analysis; the remaining spectra  
166 were frequency and phase corrected using these parameters. Total creatine (tCr) and total N-  
167 acetylaspartate (tNAA) signal intensity were determined by fitting a single Lorentzian peak to  
168 the mean OFF spectra at 3 ppm and 2 ppm, respectively. ON and OFF spectra were  
169 subtracted to produce the edited spectrum (**Fig. 1c & d**), from which GABA+ (3 ppm) and Glx  
170 (3.8 ppm) signal intensity were modelled off single- and double- Gaussian peaks, respectively.  
171 All metabolite signal intensities were calculated as the area of the fitted peak/s.

172 Intensities of GABA+, Glx, and tNAA were normalized to the commonly used internal  
173 reference tCr (Jansen et al., 2006), yielding relative concentration values (i.e., GABA+:tCr,  
174 Glx:tCr, and tNAA:tCr; **Fig. 1e**). The tCr signal is acquired within the same MEGA-PRESS  
175 transients as the target metabolites. Thus, normalization of GABA+, Glx, and tNAA to tCr  
176 minimizes the influence of changes that occur during the acquisition which alter the entire  
177 spectrum (e.g., changes in signal strength, line width, chemical shift displacement, or dilution  
178 associated with changes in blood flow (Ip et al., 2017)) this will produce no change in the ratio  
179 of target metabolites to tCr. For the correlational analyses reported in **Table 2**, a GM  
180 correction(Harris et al., 2015) was applied to the metabolite measurements with the following  
181 equation:

$$C_{tisscorr} = \frac{C_{meas}}{f_{GM}} \quad (1)$$

182 where  $C_{tisscorr}$  and  $C_{meas}$  are the GM-corrected and uncorrected metabolite concentrations  
183 (e.g., GABA+:tCr), respectively, and  $f_{GM}$  is the proportion of GM within the voxel. All other  
184 analyses report concentrations as a proportion of their initial magnitude, and thus do not  
185 require tissue correction.

### 186 **Low resolution dynamic analysis**

187 For the low-resolution dynamic analysis of the visual cortex data, we used a sliding  
188 window (width, 128 transients; step size, 2 transients) to measure average metabolite  
189 concentration as it changed over the course of the scan (256 transients/768 sec). For the  
190 posterior cingulate cortex data, we matched the duration of the sliding window width to the  
191 that used for the visual cortex data by including more transients (width, 192 transients; step  
192 size, 2 transients), and measured metabolite concentrations as they changed over the course  
193 of the scan (320 transients/640 sec). Prior to running analyses, metabolite concentration data  
194 were screened to remove noisy and/or spurious quantifications. In particular, we omitted the  
195 traces of subjects for which the concentration changed by more than 50% (GABA+/Glx) or 5%  
196 (tCr/tNAA) or the standard deviation was greater than three standard deviations from the  
197 average standard deviation. This resulted in omission of data from three and five subject's

198 data in the primary visual and posterior cingulate cortices analyses, respectively. This also  
199 resulted in omission of data from zero, two, and one subject's data from the secondary (closed,  
200 open, and stimulus) visual cortex analyses (Kurcyus et al., 2018). To remove spurious  
201 significant differences in the time course, a cluster correction was applied. Clusters were  
202 defined by the sum of their constituent  $t$ -values and compared to a null hypothesis distribution  
203 of clusters produced by shuffling the time labels (5000 permutations); positive and negative  $t$ -  
204 value clusters were treated separately. Clusters below the 95<sup>th</sup> percentile of the null hypothesis  
205 distribution were disregarded.

### 206 ***High resolution dynamic analysis***

207 The temporal resolution of MRS is severely limited by the signal-to-noise ratio of  
208 individual spectra. That is, to achieve the signal-to-noise ratio required to yield an accurate  
209 metabolic measurement, many individual spectra must be combined. In order to achieve  
210 sufficiently high signal in the low-resolution dynamic analysis, we combined multiple (128)  
211 spectra within the same subject. This method produces a dynamic trace for each participant;  
212 however, the smoothing produced by the sliding window approach may obscure both the true  
213 magnitude of metabolic change over time and dynamic changes occurring at higher frequency.  
214 Thus, to achieve higher temporal resolution, we averaged individual ON and OFF spectra  
215 across participants to produce a single trace (temporal resolution, 4 transients), with no  
216 smoothing, for each condition. Note, due to the necessity of large a sample size, this analysis  
217 was only performed with the primary datasets. Prior to running analyses, metabolite  
218 concentration data were screened to remove noisy and/or spurious quantifications.  
219 Specifically, we removed relative concentration values (GABA+/Glx:tCR) that were more than  
220 three standard deviations from the mean. This resulted in omission of two GABA+:tCr data  
221 points from the posterior cingulate cortex analysis.

222 To test for predictive relationships between GABA+ and Glx, we ran a cross-correlation  
223 analysis between the abovementioned high resolution metabolite traces. We tested for  
224 relationships in both directions, that is, whether GABA+ concentration predicts Glx  
225 concentration and vice versa. The metabolite traces comprise a limited number of time points  
226 (visual cortex: 64, posterior cingulate cortex: 80) and there is an inverse relationship between  
227 the lag separating the metabolites and the number of time points included in the cross  
228 correlation analysis. This results in less reliable correlation values at lags close to the  
229 maximum duration of the metabolite traces due to insufficient sample sizes. To avoid these  
230 unreliable correlations, we only included lags with a minimum of 25 time points in the analysis  
231 (Bonett and Wright, 2000). This yielded a total of 40 correlations for each predictive direction  
232 between GABA+ and Glx in the visual cortex and 56 for the posterior cingulate cortex. To  
233 remove spurious significant correlation values in the cross-correlation analyses, a cluster



234 correction was applied. Clusters were defined by the sum of their constituent  $t$ -values and  
235 compared to a null hypothesis distribution of clusters produced by shuffling the time labels  
236 (5000 permutations); positive and negative  $t$ -value clusters were treated separately. Clusters  
237 below the 95<sup>th</sup> percentile of the null hypothesis distribution were disregarded.

## 238 RESULTS

### 239 *Spectra quality*

240 **Table 1** shows the average FWHM (Hz), frequency drift and fitting error for  
241 measurements taken from the visual cortex (VC) and posterior cingulate cortex (PCC) from  
242 the primary datasets. For each subject, the FWHM was calculated from the average spectra,  
243 i.e., spectra averaged across all transients. Frequency drift was calculated as the standard  
244 deviation of the position of the Cr peak across individual OFF spectra, prior to alignment; the  
245 frequency drift values shown in **Table 1** reflect the average standard deviation across  
246 participants. The fitting error for GABA+, Glx, tNAA, and tCr were divided by the amplitude of  
247 their fitted peaks to produce normalized measures of uncertainty. The average fit error for  
248 each metabolite was relatively low (Mullins et al., 2014) (**Table 1**). One outlier was omitted  
249 from the posterior cingulate cortex dataset prior to calculation of the summary statistics shown  
250 in **Table 1**.

251 **Table 1.** Measures of spectral quality and fit error

| Location | FWHM (Hz) |          |         |         | Frequency drift<br>(ppm std) | Fit error |         |         |         |
|----------|-----------|----------|---------|---------|------------------------------|-----------|---------|---------|---------|
|          | GABA+     | Glx      | tNAA    | tCr     |                              | GABA+     | Glx     | tNAA    | tCr     |
| VC       | 21.6±1.2  | 17.8±0.4 | 8.7±1.4 | 8.7±1.5 | 0.0088±0.004                 | 10.1±2.2  | 1.3±0.3 | 3.6±0.2 | 3.6±0.2 |
| PCC      | 20.1±1.5  | 16.7±0.6 | 8.2±0.8 | 7.6±0.6 | 0.0063±0.006                 | 8.1±0.2   | 1.8±0.1 | 3.1±0.1 | 4.6±0.1 |

252 Note: values indicate across subject averages ± standard deviation.

### 253 *Low resolution temporal dynamics of GABA and Glx*

254 Using a sliding temporal window analysis, we quantified change in the concentration  
255 of GABA+ and Glx measured from MRS voxels targeting visual and posterior cingulate  
256 cortices over the course of 13 and 12 min periods, respectively. We found that in the visual  
257 cortex GABA+ significantly decreased (max difference=-4.5%,  $t_{(66)}=-3.71$ ,  $P=4.3e^{-4}$ ) while Glx  
258 significantly increased (max difference=2.1%,  $t_{(66)}=3.4$ ,  $P=.001$ ) over the course of the period  
259 (**Fig. 2a**). By comparison, we found that in the posterior cingulate cortex there was no  
260 significant change in either GABA or Glx (**Fig. 2b**). Given that we referenced GABA+ and Glx  
261 to tCr, a possible concern is that the changes in metabolite concentration observed in the  
262 visual cortex reflect changes in tCr, as opposed to GABA+ or Glx. However, this is unlikely as  
263 we did not find similar changes in tNAA, which was also referenced for tCr (**Fig. 2a**).

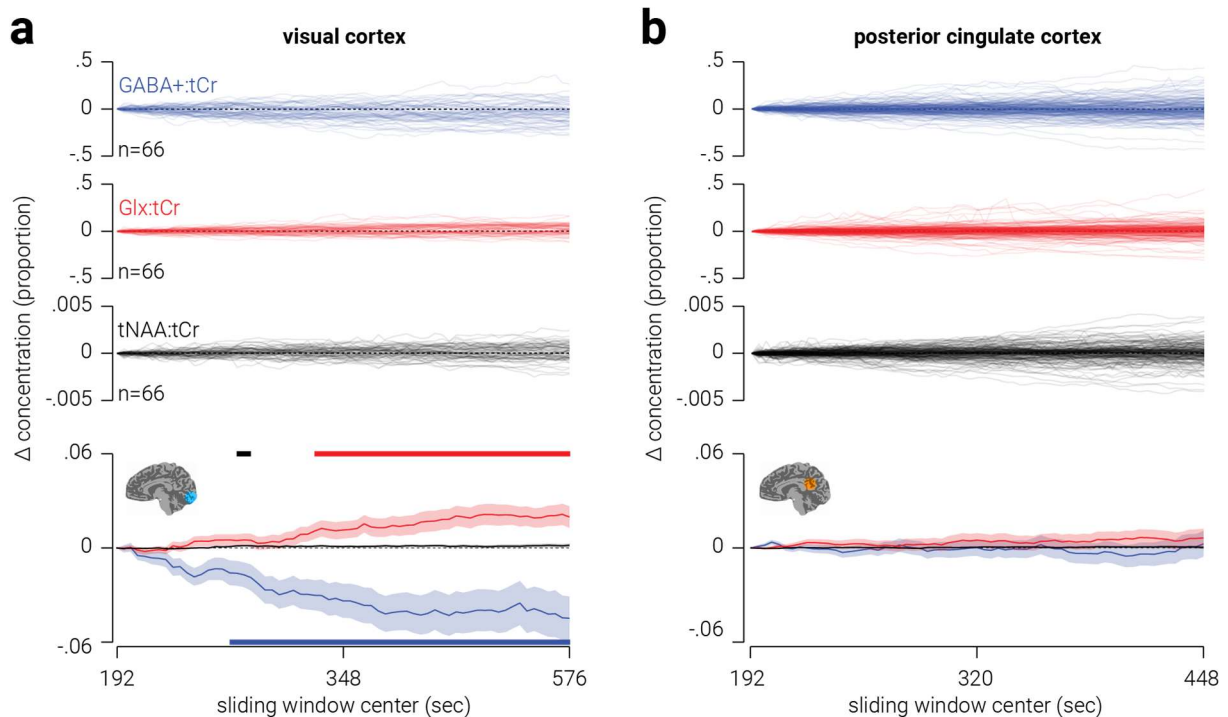

264 **Figure 2. Low resolution temporal dynamics of metabolites in visual and posterior cingulate**  
265 **cortex. (a, top)** Individual traces showing change in GABA+, Glx, and tNAA (all referenced to tCr)  
266 measured from a MRS voxel targeting the visual cortex. **(a, bottom)** Same as **(a, top)**, but averaged  
267 across participants. **(b)** Same as **(a)**, but from a MRS voxel targeting the posterior cingulate cortex.  
268 Shaded regions indicate s.e.m. and horizontal coloured bars at the top and bottom of **(a)** indicate  
269 (cluster corrected) periods of significant difference from zero.

270 Another possible concern is that changes observed in the difference spectra over time  
271 are related to scanner field drift due to gradient cooling(Lange et al., 2011) or participant  
272 motion(Bhattacharyya et al., 2007). In particular, if the scanner field drifts, the position of the  
273 editing pulse (1.9 ppm) relative to the GABA (3.0 ppm) and Glx (3.8 ppm) peaks changes.  
274 This may change the efficiency with which the peaks are edited and thus their magnitude in  
275 the difference spectrum. As the frequency drift of the spectra was relatively low (<0.01 ppm  
276 std; **Table 1**), this seems an unlikely explanation. Further, if the scanner field drifted, the  
277 position of the editing pulse relative to the GABA and Glx peaks would shift in the same  
278 direction for both metabolites. This would produce either a reduction or increase in the  
279 magnitude of both peaks. Thus, as we found GABA and Glx concentration changes in opposite  
280 directions over time, this cannot be explained by a drift in the scanner field. However, it is  
281 possible that changes in one of the metabolites could be accounted for by scanner field drift.  
282 As a further test of this possibility, we measured the tNAA trough in the difference spectra  
283 using an inverse Lorentzian. Like the magnitude of the GABA+ and Glx peaks, the magnitude  
284 of the tNAA trough reflects the efficiency of the editing pulse. Thus, if scanner drift is  
285 responsible for changes in the magnitude of the GABA+ or Glx peaks, we would expect to see

286 corresponding changes in the amplitude of the edited tNAA trough. However, we found no  
287 evidence for change in the amplitude of the edited tNAA trough over time.

288 For each voxel location, we assessed whether there were relationships between  
289 different static metabolite concentrations or changes in different concentrations. For static  
290 measurements, we averaged across all 256/320 transients. The results of the analysis are  
291 shown in **Table 2**. For static metabolite concentrations, we found a positive relationship  
292 between Glx and tNAA measured from both visual and posterior cingulate cortices. We also  
293 found a positive correlation between GABA+ and tNAA in the visual cortex, and between  
294 GABA+ and Glx in the posterior cingulate cortex. By contrast, we found no relationships  
295 between the change in different metabolite concentrations.

296 **Table 2.** Correlation coefficients between metabolites measured from visual and posterior  
297 cingulate cortices

| Location | GABA+ & Glx | GABA+ & tNAA | Glx & tNAA | $\Delta$ GABA+ &<br>$\Delta$ Glx | $\Delta$ GABA+ &<br>$\Delta$ tNAA | $\Delta$ Glx &<br>$\Delta$ tNAA |
|----------|-------------|--------------|------------|----------------------------------|-----------------------------------|---------------------------------|
| VC       | -0.10       | 0.32**       | 0.38**     | 0.03                             | -0.19                             | 0.10                            |
| PCC      | 0.25***     | 0.49***      | 0.17       | 0.05                             | -0.05                             | -0.08                           |

298 *Note: Correlation coefficients are partial coefficients after controlling for the common reference metabolite tCr; VC*  
299 *and PCC denote visual and posterior cingulate cortex; all metabolites are referenced to tCr and tissue-corrected;*  
300 *single, double, and triple asterisks indicate  $P < .05$ ,  $P < .01$ , and  $P < .001$ , respectively.*

301 Previous MRS work compared static measurements of GABA+ and Glx concentration  
302 taken from a voxel targeting the visual cortex while participants either had their eyes closed,  
303 open in the darkness, or open while viewing a dynamic checkerboard stimulus (Kurcyus et al.,  
304 2018). This work revealed that GABA+ concentrations were higher when participants had their  
305 eyes closed, compared to open in darkness, while Glx concentration was lower when  
306 participants' eyes were closed, compared to when receiving visual stimulation. We did not  
307 acquire data from participants under different viewing conditions; however, we found that the  
308 concentration of GABA+ and Glx changed over the course of the scan when participants had  
309 their eyes closed. As a further test of this result, we reanalysed the data from Kurcyus et al.  
310 (2018) (Kurcyus et al., 2018), henceforth referred to as the K-dataset, using our dynamic sliding  
311 analysis.

312 As a sanity check, we first analysed the K-dataset using the standard static analysis,  
313 replicating the pattern of results found in the previous study (**Fig. 3a-b**; Kurcyus et al., 2018).  
314 Additionally, we applied this analysis to tNAA, for which we found no significant differences  
315 between conditions (**Fig. 3c**). We then applied a sliding temporal window analysis to the data  
316 to test for dynamic trends in metabolite concentration. We found that in the visual stimulation  
317 condition there was an increase in Glx (max difference=1.9%,  $t_{(25)}=2.58$ ,  $P=.019$ ) and tNAA  
318 (max difference=0.1%,  $t_{(25)}=4.03$ ,  $P=4.3e^{-4}$ ), however, we found no other significant differences  
319 for GABA+, Glx, or tNAA across the three conditions (**Fig. 3d-f**). The eyes closed and eyes

320 open (in darkness) conditions of the K-dataset are analogous to the primary visual cortex  
321 dataset in the presented in the previous analyses, as in both there is a deprivation of visual  
322 stimulation. Thus, we may have expected to find a similar pattern of results, i.e., a decrease  
323 in GABA+ and an increase in Glx. However, the scan duration of the K-dataset was only two  
324 thirds that of ours. Indeed, in the period captured by the sliding window analysis of the K-  
325 dataset, Glx in the primary visual cortex dataset had not yet significantly risen above zero and  
326 GABA+ had only just begun to reduce significantly below zero (**Fig. 3d**, dotted lines). Further,  
327 there are fewer than half the number of participants in the K-dataset, thus less power to detect  
328 a difference. Despite these differences, the numerical pattern of results from the closed eyes  
329 and open eyes (in darkness) conditions of the K-dataset are similar to ours: the average  
330 change in concentration GABA+ and Glx is always negative and positive, respectively. By  
331 contrast, while in the visual stimulation condition the average change in concentration of Glx  
332 is always positive, GABA+ is less consistently negative than in the other two conditions.

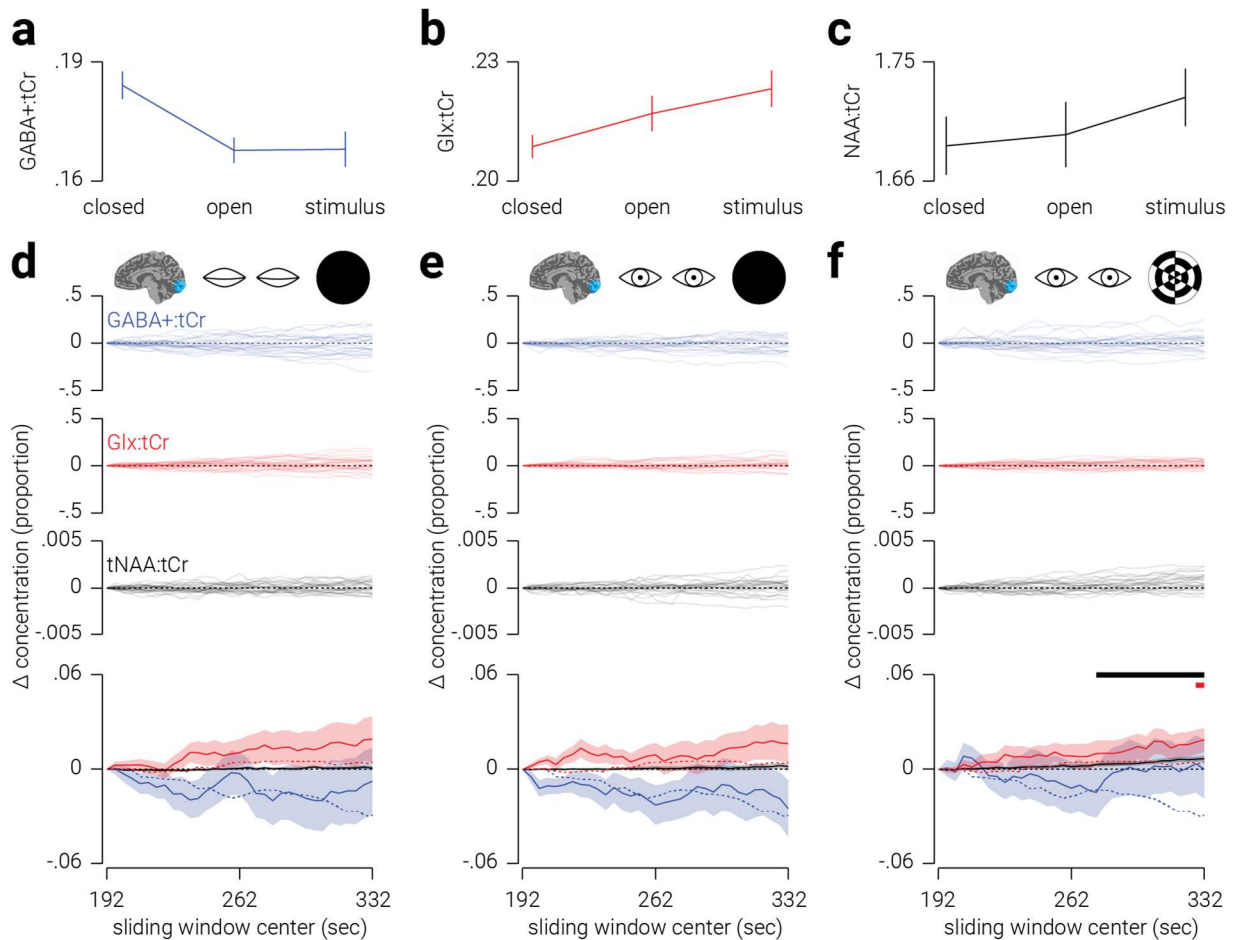

333

334 **Figure 3. Low resolution temporal dynamics of metabolites in visual cortex during different**  
335 **viewing conditions.** Static average concentration of (a) GABA+, (b) Glx, and (c) tNAA measured  
336 from a MRS voxel targeting the visual cortex when participants have their eyes closed, open in  
337 darkness, or open while viewing a dynamic checkerboard stimulus; data is reanalysed from (Kurcys  
338 et al., 2018). (d, top) Individual traces showing change in GABA+, Glx, and tNAA in the visual cortex  
339 when participants have their eyes closed. (d, bottom) Same as (d, top), but averaged across  
340 participants. For comparison, the dotted lines show the results from the visual cortex dataset of the  
341 main analysis. (e & f) Same as (d), but while participants have their eyes open in (e) darkness or (f)  
342 while viewing a dynamic checkerboard stimulus. All metabolite concentrations are referenced to tCr.  
343 Error bars in (a-c) and shaded regions in (d-f) indicate (cluster corrected) periods of significant difference from zero.

### 345 **High resolution temporal dynamics of GABA and Glx**

346 In the previous analysis we used a temporal sliding window to measure change in  
347 metabolite concentrations over time. The signal-to-noise ratio of MRS measurements  
348 constrains the minimum window size that can be applied with this analysis. To overcome this  
349 limitation, we used a novel approach in which measurements are combined across subjects  
350 to achieve the maximum temporal resolution afforded by the relaxation time of the acquisition,  
351 e.g., 3 sec. In the visual cortex, we found change in GABA+, relative from the first  
352 measurement, was primarily negative, with a minimum of -20%, while change in Glx was  
353 primarily positive, with maximum of 7% (Fig. 4a). These results are consistent with those from  
354 the previous analysis, except the higher temporal resolution obtained with the current

355 approach revealed considerably larger changes in metabolite concentration than the previous  
356 estimates, which were likely obscured by smoothing measurements across the temporal  
357 window. In the posterior cingulate cortex, we found that change in both GABA+ and Glx was  
358 primarily negative, and similar in amplitude (**Fig. 4b**).

359

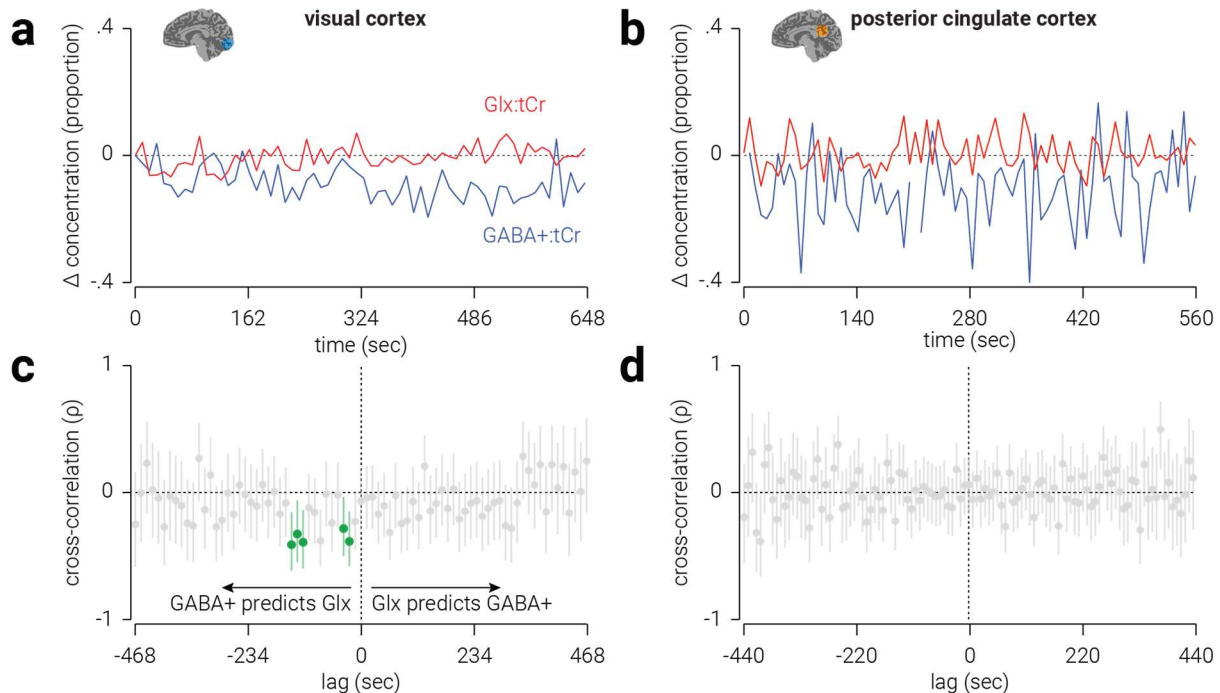

360

361 **Figure 4. High resolution temporal dynamics of metabolites in visual and posterior cingulate**  
362 **cortex.** Change in GABA+ and Glx concentration measured from voxels targeting (a) visual and (b)  
363 posterior cingulate cortices. (c-d) Cross-correlations between GABA+ and Glx concentration  
364 measured from voxels targeting (c) visual and (d) posterior cingulate cortices. Lag values indicate the  
365 duration between when the GABA+ measurements were acquired and the Glx measurements were  
366 acquired. Correlations at negative lags indicate GABA+ concentration predicts Glx concentration and  
367 correlations at positive lags indicate Glx predicts GABA+. Vertical lines indicate 95% confidence  
368 intervals; cluster-corrected correlations that are significantly different than zero are highlighted in  
369 green. All values are referenced to tCr.

370

371 While GABA and Glx are thought to support opposing mechanisms in the central  
372 nervous system, i.e., inhibition and excitation, it seems reasonable to expect interactions  
373 between these metabolites. For example, Gln is a primary source of GABA synthesis (Patel  
374 et al., 2001; Paulsen et al., 1988; Rae et al., 2003). Indeed, we found that the static  
375 concentration of GABA+ and Glx were positively related in the posterior cingulate cortex.  
376 However, we found no evidence for a relationship between the overall changes in these  
377 metabolites in either the visual or posterior cingulate cortex (**Table 2**). One reason for this may  
378 be that the relationship between these metabolites may only be observed at a temporally high  
379 resolution, but not averaged across a 12/13 minute period. To test this hypothesis, we used  
380 the high temporal resolution metabolite measurements to perform cross-correlation analyses  
381 on GABA+ and Glx concentration.

382 For the visual cortex, we found that the concentration of GABA+ predicted that of Glx  
383 during two periods of latency (**Fig. 4c**, green markers). The first period was between 24-36  
384 sec (n(time points)=[62,61], Pearson  $r=[-.36,-.28]$ ,  $P=[.005,.029]$ ) and the second period was  
385 between 120-144 sec (n(time points)=[54,53,52], Pearson  $r=[-.34,-.32,-.39]$ ,  
386  $P=[.011,.019,.004]$ ). This relationship was consistently negative, that is, a positive/negative  
387 change in GABA+ predicted a later change in Glx in the opposite direction. By contrast, we  
388 found no periods of latency in which Glx predicted the concentration of GABA+. For the  
389 posterior cingulate cortex, we found no periods of latency in which there was a significant  
390 relationship between GABA+ and Glx (**Fig. 4d**).

391 A possible concern is that the relationship between GABA+ and Glx was the influenced  
392 by their common reference metabolite (tCr). However, we found the same pattern of results  
393 when tNAA, rather than tCr, was used as a reference metabolite (**Fig. 5a**). Another possible  
394 concern with this new analysis is that the signal-to-noise ratio is insufficiently high to yield valid  
395 measurements, e.g., due to poor peak fitting. To assess the validity of the measurements, we  
396 attempted to reproduce the results from the low-resolution temporal analysis by applying a  
397 sliding window to the high-resolution metabolite trace. If the high-resolution measurements  
398 are valid, we should see a correspondence between the average results from the low-  
399 resolution analysis and those produced by applying a sliding temporal window to the high-  
400 resolution measurements. For the visual cortex, we found a high correlation between the  
401 measurements produced by the two analyses for both GABA+ (n=65,  $r=.979$ ,  $P<1.0e^{-10}$ ; **Fig.**  
402 **5b**, top) and Glx (n=65,  $r=.993$ ,  $P<1.0e^{-10}$ ). These results support the validity of the high-  
403 resolution measurements and the results of the cross-correlation analysis.

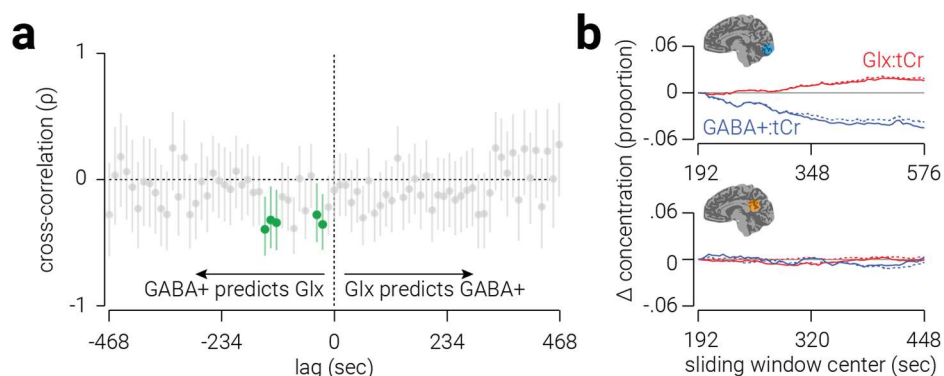

404 **Figure 5. Controls for high resolution analyses.** (a) Cross-correlations between GABA+ and Glx,  
405 referenced to tNAA, measured from voxels targeting visual cortex. Vertical lines indicate 95%  
406 confidence intervals; cluster-corrected correlations that are significantly different than zero are  
407 highlighted in green, correlations at negative lags indicate GABA+ predicts Glx and correlations at  
408 positive lags indicate Glx predicts GABA+. (b) Comparison between results from sliding window  
409 method used in the low temporal resolution analysis (dashed lines) and sliding window applied to  
410 results from high resolution analysis (solid lines) for (b, top) visual and (b, bottom) posterior cingulate  
411 cortices.



## 412 DISCUSSION

413 MRS can be used in vivo to quantify metabolite concentration and provide evidence  
414 for the involvement of different neurotransmitter systems, e.g., inhibitory and excitatory, in  
415 sensory and cognitive processes. In MRS studies, temporal resolution is typically sacrificed to  
416 achieve sufficient signal-to-noise ratio to produce a reliable estimate of metabolite  
417 concentration. Here we use novel analyses with large datasets to reveal the dynamics of  
418 GABA+ and Glx in visual and posterior cingulate cortices. We replicate previously established  
419 relationships between metabolites measured using the standard approach. We use a sliding  
420 window approach to show that under conditions of binocular visual deprivation, the dynamic  
421 concentrations of GABA+ and Glx in the visual cortex drifts in opposite directions, that is,  
422 GABA+ decreases while Glx increases over time. We then use a new method of combining  
423 MRS measurements across subjects, as opposed to time, to produce a high temporal  
424 resolution index of metabolite concentration. Using this approach, we find that in the visual  
425 cortex, a change in the concentration of GABA+ predicts the opposite change in Glx ~30 and  
426 ~120 sec later, e.g., an increase in GABA+ is correlated with a subsequent reduction in Glx.

### 427 *Dynamic response of GABA and Glx in the visual cortex*

428 Several studies have investigated GABA and/or Glx/Glu concentration in the visual  
429 cortex in response to different viewing conditions. Meikle et al. (2017) found a ~5% reduction  
430 in GABA concentration in response to visual stimulation. By contrast, while Kurcys et al.  
431 (2018) reported that GABA was 16% lower when participants had their eyes open with no  
432 visual stimulation compared to when closed, they, like others (Bednařik et al., 2018, 2015;  
433 Mangia et al., 2007; Schaller et al., 2013), found no evidence for a difference in GABA in  
434 response to visual stimulation. Based on these somewhat inconsistent findings, one may infer  
435 that visual stimulation, or merely having the eyes open, leads to a reduction in the  
436 concentration of GABA in the visual cortex. Extending this rationale, one could predict that  
437 closing the eyes should produce an increase in GABA. By contrast, we found the opposite  
438 result: during a 13 min period of resting in which participants' eyes were closed, the  
439 concentration of GABA+ in the visual cortex reduced on average by 4.5%.

440 Our reanalysis of data comparing metabolite concentration in the visual cortex under  
441 different viewing conditions suggests that these results may not be mutually exclusive.  
442 Consistent with the original study (Kurcys et al., 2018), we found that static measurements  
443 of GABA+ indicated concentrations were higher when participants had their eyes closed.  
444 Despite this, dynamic analysis of the data indicated a trend towards reduction in concentration  
445 over time. This pattern of results was more consistent when participants had their eyes closed  
446 than during visual stimulation. Indeed, our results are consistent with previous work showing

447 that monocular deprivation leads to reduced GABA concentration (~8%) in the visual cortex,  
448 but not the posterior cingulate cortex, relative a pre-deprivation baseline measurement (Lunghi  
449 et al., 2015b). Thus, our finding that GABA is reduced when both eyes are closed may indicate  
450 that visual deprivation, either monocular or binocular, evokes a reduction in the concentration  
451 of GABA in the visual cortex.

452 Previous observations of Glx concentration in the visual cortex have been more  
453 consistent; several studies have shown Glx/Glu concentration increases (2-4%) in response  
454 to visual stimulation (Bednařík et al., 2018, 2015; Ip et al., 2017; Kurcycus et al., 2018; Lin et  
455 al., 2012; Mangia et al., 2007; Schaller et al., 2013). Increased Glu in the visual cortex, evoked  
456 by visual stimulation, has been linked to increased blood-oxygenation level dependent  
457 responses (Ip et al., 2017). Further, here we measured Glx, a complex comprising Glu and  
458 Gln, and previous 7T MRS work suggests that visual stimulation evoked changes in Glu, but  
459 not Gln, in the visual cortex (Bednařík et al., 2018, 2015; Schaller et al., 2013). It is possible  
460 that the increase in Glx we found here, which occurred in the absence of visual stimulation,  
461 was driven by an alternative mechanism, one that is unrelated to BOLD activity and/or reflects  
462 changes in Gln rather than Glu. More work is needed to disambiguate changes in metabolite  
463 concentration that occur in the visual cortex at different time scales and under different viewing  
464 conditions. For instance, future work could combine fMRI and MRS measurements to test  
465 whether the phenomenon observed here is related to BOLD activity (Ip et al., 2017).

466 To produce a high temporal resolution measure of metabolite concentrations, we  
467 applied a novel approach in which we combined MRS transients across subjects, rather than  
468 time. This approach yields a single measurement of metabolite concentration as a function of  
469 time; thus, we cannot test the statistical significance of the changes observed over time.  
470 However, it is reasonable to assume that the changes observed using the sliding temporal  
471 window or static approaches underestimate the true magnitude of change, due to averaging.  
472 Measurements produced by combining transients across subjects provide an indication of the  
473 true magnitude of change in GABA+ and Glx during the scan: up to 20% for GABA+ and 7%  
474 for Glx.

#### 475 ***Dynamic relationship between GABA and Glx***

476 A common factor of studies of GABA and Glx/Glu in the visual cortex is that these  
477 metabolites consistently change in opposite directions, and not in the same direction (Kurcycus  
478 et al., 2018; Mekle et al., 2017; Rideaux et al., 2019). This pattern would suggest an  
479 interdependency between the two metabolites. Given that Gln is a primary source of GABA  
480 synthesis (Patel et al., 2001; Paulsen et al., 1988; Rae et al., 2003), one may expect that a  
481 change in the concentration of GABA may result in a corresponding change in Glx (Gln and  
482 Glu), or vice versa. In line with this, our high temporal resolution analysis of the data revealed

483 a striking cross-correlation between these metabolites in the visual cortex. Specifically, we  
484 found that the concentration of GABA+ predicts the concentration of Glx ~30 and ~120 sec  
485 later. This relationship, which accounts for up to ~20% of the variance of Glx, is obscured by  
486 conventional approaches of MRS analysis; indeed, we found no evidence for a relationship  
487 between the overall change in GABA+ and Glx.

488 A limitation of MRS is that it measures the total concentration of neurochemicals within  
489 a localized region and cannot distinguish between intracellular and extracellular pools of  
490 GABA. It is generally thought that intracellular vesicular GABA drives neurotransmission  
491 (Belelli et al., 2009), whereas extracellular GABA maintains tonic cortical inhibition (Martin and  
492 Rimvall, 1993). Synthesis of intracellular GABA from Gln via the GABA-Gln cycle occurs on  
493 the scale of milliseconds, so it seems unlikely that this metabolic association could explain the  
494 predictive relationship between GABA and Glx concentration ~30 and ~120 sec later. Instead,  
495 this relationship may reflect changes in the level of extracellular GABA, followed by relatively  
496 sluggish changes in the concentration of Glu to maintain the balance of inhibition and  
497 excitation.

#### 498 **Conclusion**

499 The relatively low signal-to-noise of MRS measurements has shaped the types of  
500 questions that the technique has been used to address. Here we overcome this limitation by  
501 combining data from large cohorts to examine the dynamics of GABA and Glx concentration  
502 in the visual cortex. Through use of existing and novel analyses, we reveal opposing dynamic  
503 shifts in GABA and Glx in the visual cortex while participants are at rest. Further, we  
504 demonstrate a predictive relationship between GABA and Glx that is present in both visual  
505 and posterior cingulate cortices. This study exposes temporal trends of primary  
506 neurotransmitters in the visual cortex, and more generally, these findings demonstrate the  
507 feasibility of using MRS to investigate in vivo dynamic changes of metabolites.

#### 508 **Acknowledgements**

509 The work was supported by the Leverhulme Trust (ECF-2017-573), the Issac Newton  
510 Trust (17.08(o)), and the Wellcome Trust (095183/Z/10/Z). I acknowledge the assistance of  
511 Katarzyna Kurcyus, Valentin Riedl, Mark Mikkelsen, and Richard Edden in supplying their data  
512 for reanalysis.

## 513 REFERENCES

- 514 Bednařík P, Tkáč I, Giove F, Dinuzzo M, Deelchand DK, Emir UE, Eberly LE, Mangia S. 2015.  
515 Neurochemical and BOLD responses during neuronal activation measured in the human visual  
516 cortex at 7 Tesla. *J Cereb Blood Flow Metab* **35**:601–610. doi:10.1038/jcbfm.2014.233
- 517 Bednařík P, Tkáč I, Giove F, Eberly LE, Deelchand DK, Barreto FR, Mangia S. 2018. Neurochemical  
518 responses to chromatic and achromatic stimuli in the human visual cortex. *J Cereb Blood Flow*  
519 *Metab* **38**:347–359. doi:10.1177/0271678X17695291
- 520 Belelli D, Harrison NL, Maguire J, Macdonald RL, Walker MC, Cope DW. 2009. Extrasynaptic GABAA  
521 Receptors: Form, Pharmacology, and Function. *J Neurosci* **29**:12757–12763.  
522 doi:10.1523/JNEUROSCI.3340-09.2009
- 523 Bhattacharyya PK, Lowe MJ, Phillips MD. 2007. Spectral quality control in motion-corrupted single-  
524 voxel J-difference editing scans: An interleaved navigator approach. *Magn Reson Med* **58**:808–  
525 812. doi:10.1002/mrm.21337
- 526 Bonett DG, Wright TA. 2000. Sample size requirements for estimating Pearson, Kendall and  
527 Spearman correlations. *Psychometrika* **65**:23–28. doi:10.1007/BF02294183
- 528 Boroojerdi B, Battaglia F, Muellbacher W, Cohen LG. 2001. Mechanisms underlying rapid experience-  
529 dependent plasticity in the human visual cortex. *Proc Natl Acad Sci U S A* **98**:14698–14701.  
530 doi:10.1073/pnas.251357198
- 531 Boroojerdi B, Bushara KO, Corwell B, Immisch I, Battaglia F, Muellbacher W, Cohen LG. 2000.  
532 Enhanced Excitability of the Human Visual Cortex Induced by Short-term Light Deprivation.  
533 *Cereb Cortex* **10**:529–534. doi:10.1093/cercor/10.5.529
- 534 Edden RAE, Muthukumaraswamy SD, Freeman TCA, Singh KD. 2009. Orientation Discrimination  
535 Performance Is Predicted by GABA Concentration and Gamma Oscillation Frequency in Human  
536 Primary Visual Cortex. *J Neurosci* **29**:15721–15726. doi:10.1523/JNEUROSCI.4426-09.2009
- 537 Edden RAE, Puts NAJ, Harris AD, Barker PB, Evans CJ. 2014. Gannet: A batch-processing tool for  
538 the quantitative analysis of gamma-aminobutyric acid-edited MR spectroscopy spectra. *J Magn*  
539 *Reson Imaging* **40**:1445–1452. doi:10.1002/jmri.24478
- 540 Harris AD, Puts NAJ, Edden RAE. 2015. Tissue correction for GABA-edited MRS: Considerations of  
541 voxel composition, tissue segmentation, and tissue relaxations. *J Magn Reson Imaging*  
542 **42**:1431–1440. doi:10.1002/jmri.24903
- 543 He HY, Hodos W, Quinlan EM. 2006. Visual deprivation reactivates rapid ocular dominance plasticity  
544 in adult visual cortex. *J Neurosci* **26**:2951–2955. doi:10.1523/JNEUROSCI.5554-05.2006
- 545 Huang S, Gu Y, Quinlan EM, Kirkwood A. 2010. A refractory period for rejuvenating GABAergic  
546 synaptic transmission and ocular dominance plasticity with dark exposure. *J Neurosci*  
547 **30**:16636–16642. doi:10.1523/JNEUROSCI.4384-10.2010
- 548 Ip IB, Berrington A, Hess AT, Parker AJ, Emir UE, Bridge H. 2017. Combined fMRI-MRS acquires

- 549 simultaneous glutamate and BOLD-fMRI signals in the human brain. *Neuroimage* **155**:113–119.  
550 doi:10.1016/J.NEUROIMAGE.2017.04.030
- 551 Jansen JFA, Backes WH, Nicolay K, Kooi ME. 2006. <sup>1</sup>H MR Spectroscopy of the Brain: Absolute  
552 Quantification of Metabolites. *Radiology* **240**:318–332. doi:10.1148/radiol.2402050314
- 553 Kurcys K, Annac E, Hanning NM, Harris AD, Oeltzschner G, Edden RAE, Riedl V. 2018. Opposite  
554 Dynamics of GABA and Glutamate Levels in the Occipital Cortex during Visual Processing. *J*  
555 *Neurosci* **38**:9967–9976. doi:10.1523/JNEUROSCI.1214-18.2018
- 556 Lange T, Zaitsev M, Buechert M. 2011. Correction of frequency drifts induced by gradient heating in  
557 <sup>1</sup>H spectra using interleaved reference spectroscopy. *J Magn Reson Imaging* **33**:748–754.  
558 doi:10.1002/jmri.22471
- 559 Lin Y, Stephenson MC, Xin L, Napolitano A, Morris PG. 2012. Investigating the metabolic changes  
560 due to visual stimulation using functional proton magnetic resonance spectroscopy at 7 T. *J*  
561 *Cereb Blood Flow Metab* **32**:1484–1495. doi:10.1038/jcbfm.2012.33
- 562 Lunghi C, Berchicci M, Morrone MC, Di Russo F. 2015a. Short-term monocular deprivation alters  
563 early components of visual evoked potentials. *J Physiol* **593**:4361–4372. doi:10.1113/JP270950
- 564 Lunghi C, Emir UE, Morrone MC, Bridge H. 2015b. Short-Term monocular deprivation alters GABA in  
565 the adult human visual cortex. *Curr Biol*. doi:10.1016/j.cub.2015.04.021
- 566 Mangia S, Tkáč I, Gruetter R, Van de Moortele P-F, Maraviglia B, Uğurbil K. 2007. Sustained  
567 Neuronal Activation Raises Oxidative Metabolism to a New Steady-State Level: Evidence from <sup>1</sup>  
568 H NMR Spectroscopy in the Human Visual Cortex. *J Cereb Blood Flow Metab* **27**:1055–1063.  
569 doi:10.1038/sj.jcbfm.9600401
- 570 Martin DL, Rimvall K. 1993. Regulation of  $\gamma$ -Aminobutyric Acid Synthesis in the Brain. *J Neurochem*.  
571 doi:10.1111/j.1471-4159.1993.tb03165.x
- 572 Mекle R, Kühn S, Pfeiffer H, Aydin S, Schubert F, Ittermann B. 2017. Detection of metabolite changes  
573 in response to a varying visual stimulation paradigm using short-TE <sup>1</sup>H MRS at 7 T. *NMR*  
574 *Biomed* **30**:e3672. doi:10.1002/nbm.3672
- 575 Mescher M, Merkle H, Kirsch J, Garwood M, Gruetter R. 1998. Simultaneous in vivo spectral editing  
576 and water suppression. *NMR Biomed* **11**:266–272. doi:10.1002/(SICI)1099-  
577 1492(199810)11:6<266::AID-NBM530>3.0.CO;2-J
- 578 Mescher M, Tannus A, O'Neil Johnson M, Garwood M. 1996. Solvent suppression using selective  
579 echo dephasing. *J Magn Reson - Ser A* **123**:226–229. doi:10.1006/jmra.1996.0242
- 580 Mikkelsen M, Barker PB, Bhattacharyya PK, Brix MK, Buur PF, Cecil KM, Chan KL, Chen DYT,  
581 Craven AR, Cuyppers K, Dacko M, Duncan NW, Dydak U, Edmondson DA, Ende G, Ersland L,  
582 Gao F, Greenhouse I, Harris AD, He N, Heba S, Hoggard N, Hsu T-W, Jansen JFA, Kangarlu A,  
583 Lange T, Lebel RM, Li Y, Lin C-YE, Liou J-K, Lirng J-F, Liu F, Ma R, Maes C, Moreno-Ortega M,  
584 Murray SO, Noah S, Noeske R, Noseworthy MD, Oeltzschner G, Prisciandaro JJ, Puts NAJ,  
585 Roberts TPL, Sack M, Sailasuta N, Saleh MG, Schallmo M-P, Simard N, Swinnen SP,

- 586 Tegenthoff M, Truong P, Wang G, Wilkinson ID, Wittsack H-J, Xu H, Yan F, Zhang C,  
587 Zipunnikov V, Zöllner HJ, Edden RAE. 2017. Big GABA: Edited MR spectroscopy at 24 research  
588 sites. *Neuroimage* **159**:32–45. doi:10.1016/j.neuroimage.2017.07.021
- 589 Mikkelsen M, Harris AD, Edden RAE, Puts NAJ. 2018a. Macromolecule-suppressed GABA  
590 measurements correlate more strongly with behavior than macromolecule-contaminated  
591 GABA+ measurements. *Brain Res* **1701**:204–211. doi:10.1016/J.BRAINRES.2018.09.021
- 592 Mikkelsen M, Loo RS, Puts NAJ, Edden RAE, Harris AD. 2018b. Designing GABA-edited magnetic  
593 resonance spectroscopy studies: Considerations of scan duration, signal-to-noise ratio and  
594 sample size. *J Neurosci Methods*. doi:10.1016/j.jneumeth.2018.02.012
- 595 Mikkelsen M, Rimbault DL, Barker PB, Bhattacharyya PK, Brix MK, Buur PF, Cecil KM, Chan KL,  
596 Chen DYT, Craven AR, Cuypers K, Dacko M, Duncan NW, Dydak U, Edmondson DA, Ende G,  
597 Erslund L, Forbes MA, Gao F, Greenhouse I, Harris AD, He N, Heba S, Hoggard N, Hsu T-W,  
598 Jansen JFA, Kangarlu A, Lange T, Lebel RM, Li Y, Lin C-YE, Liou J-K, Lirng J-F, Liu F, Long  
599 JR, Ma R, Maes C, Moreno-Ortega M, Murray SO, Noah S, Noeske R, Noseworthy MD,  
600 Oeltzschner G, Porges EC, Prisciandaro JJ, Puts NAJ, Roberts TPL, Sack M, Sailasuta N,  
601 Saleh MG, Schallmo M-P, Simard N, Stoffers D, Swinnen SP, Tegenthoff M, Truong P, Wang G,  
602 Wilkinson ID, Wittsack H-J, Woods AJ, Xu H, Yan F, Zhang C, Zipunnikov V, Zöllner HJ, Edden  
603 RAE. 2019. Big GABA II: Water-referenced edited MR spectroscopy at 25 research sites.  
604 *Neuroimage* **191**:537–548. doi:10.1016/J.NEUROIMAGE.2019.02.059
- 605 Mullins PG, McGonigle DJ, O’Gorman RL, Puts NAJ, Vidyasagar R, Evans CJ, Edden RAE, Brookes  
606 MJ, Garcia A, Foerster BR, Petrou M, Price D, Solanky BS, Violante IR, Williams S, Wilson M.  
607 2014. Current practice in the use of MEGA-PRESS spectroscopy for the detection of GABA.  
608 *Neuroimage* **86**:43–52. doi:10.1016/j.neuroimage.2012.12.004
- 609 Patel AB, Rothman DL, Cline GW, Behar KL. 2001. Glutamine is the major precursor for GABA  
610 synthesis in rat neocortex in vivo following acute GABA-transaminase inhibition. *Brain Res*  
611 **919**:207–220. doi:10.1016/S0006-8993(01)03015-3
- 612 Paulsen RE, Odden E, Fonnum F. 1988. Importance of glutamine for gamma-aminobutyric acid  
613 synthesis in rat neostriatum in vivo. *J Neurochem* **51**:1294–9. doi:10.1111/j.1471-  
614 4159.1988.tb03099.x
- 615 Puts NAJ, Edden RAE. 2012. In vivo magnetic resonance spectroscopy of GABA: A methodological  
616 review. *Prog Nucl Magn Reson Spectrosc* **60**:29–41. doi:10.1016/j.pnmrs.2011.06.001
- 617 Rae C, Hare N, Bubb WA, McEwan SR, Bröer A, McQuillan JA, Balcar VJ, Conigrave AD, Bröer S.  
618 2003. Inhibition of glutamine transport depletes glutamate and GABA neurotransmitter pools:  
619 Further evidence for metabolic compartmentation. *J Neurochem* **85**:503–514.  
620 doi:10.1046/j.1471-4159.2003.01713.x
- 621 Rideaux R, Goncalves NR, Welchman AE. 2019. Mixed-polarity random-dot stereograms alter GABA  
622 and Glx concentration in the early visual cortex. *J Neurophysiol* **122**:888–896.  
623 doi:10.1152/jn.00208.2019

- 624 Schaller B, Mekte R, Xin L, Kunz N, Gruetter R. 2013. Net increase of lactate and glutamate  
625 concentration in activated human visual cortex detected with magnetic resonance spectroscopy  
626 at 7 tesla. *J Neurosci Res* **91**:1076–1083. doi:10.1002/jnr.23194
- 627 Tkáč I, Gruetter R. 2005. Methodology of <sup>1</sup>H NMR spectroscopy of the human brain at very high  
628 magnetic fields. *Appl Magn Reson* **29**:139–157. doi:10.1007/BF03166960
